# Supplementary material for: A Novel Gene SbSI-2 Encoding Nuclear Protein from a Halophyte Confers Abiotic Stress Tolerance in E. coli and Tobacco
Source: PLoS One. 2014 Jul 7;9(7):e101926. doi: 10.1371/journal.pone.0101926 (PMC4084957; doi:10.1371/journal.pone.0101926)

**Figure S1**

**A**

```

1 - GCAAACCACAGCCTTTTTCCTTTAC - 26
27 - ATGGGATTTCATTCCCTTGACGTCTTCTACTTTTTCTTCTTTCTTGGCCTAACCCCTAAT - 86
1 - M G F H S F D V F Y F F F L S C P N P N - 20

87 - TTCTGTTTTTCTCTCTCTTTATCAAATTTCCAGAAAAAATCTCGAGATAAAGAGAGGGAG - 146
21 - F C F S L S L S N F Q K K S R D K E R E - 40

147 - ATTCAGACCAATTATCCTACATTCAAAAAATCCAAAAAATACAAAACCCAGAAAGAAA - 206
41 - I Q T N Y P T F K K S K K N T K P R K K - 60

207 - AAGGCAAGAAAAAATGGGGAAGTATTTCAGAGTTGATAGATGCAGGGGTAAGAATTGCT - 266
61 - K A R K K M G K Y S E L I D A G V R I A - 80

267 - GCCCGATTTCATTCTCACTGCCCCGAACTGCCCGGATGTATTATCACCTCCTCCTCCG - 326
81 - A R F H S H C P Q T A R M Y Y H P P P P - 100

327 - ACCACCGCGGAGTCGGGCCCCACCCAACGATATCCACCGCAAGACGGCGGCGTTTTGGGT - 386
101 - T T A E S G P T Q R Y P P Q D G G V L G - 120

387 - TGCAAAGGAAGCTCTTCTGGAGTTGATATTACCAAGGATCTGATTCTTCATTTCGATTGT - 446
121 - C K G S S S G V D I T K D L I L H S I C - 140

447 - TGA - 449
141 - *
450 - TTTTAAAAAAAATTCTGATTGGAAGCTAGAGTTATGTTAGAAACATTAGGT
TGAATCCTATTAACACAAAAAATAAAAAAAAAA - 537

```

**B**

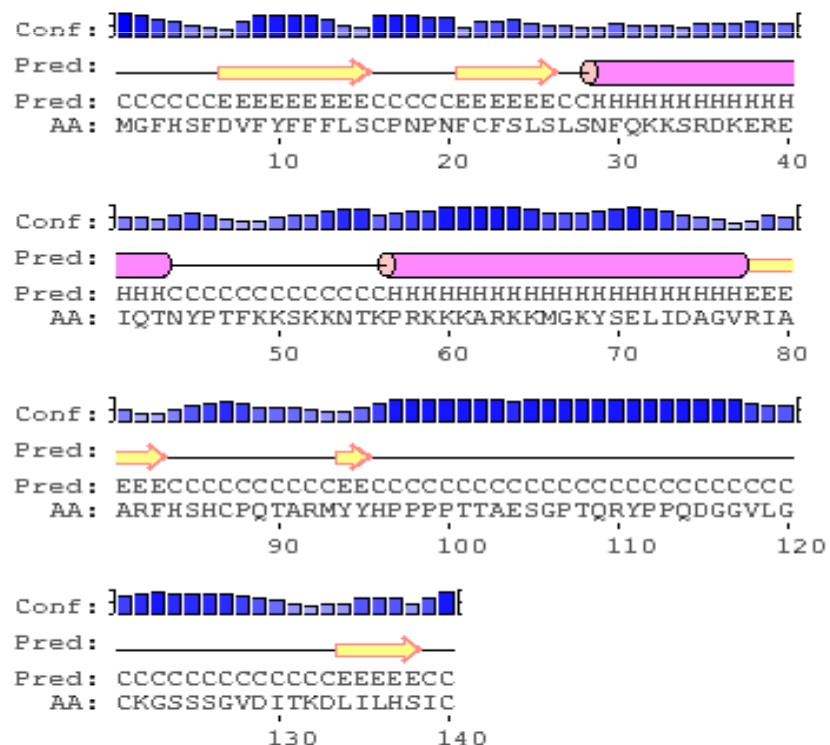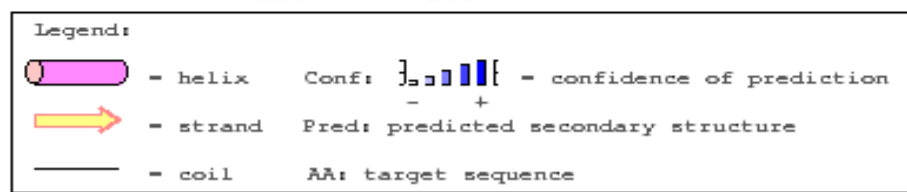

Supplement: Figure S1 — Nucleotide sequence with deduced amino acid sequence and predicted secondary structure of SbSI-2 protein. (A) Full-length cDNA and deduced amino acid sequence of SbSI-2. Start codon (ATG) and stop codon (TGA) are indicated by green and red colour, respectively. The 5′ and 3′-UTR regions are indicated by blue color. (B) Predicted secondary structure viz. helix, strands and coils as indicated by pink rods, arrow and solid lines, respectively. (PDF) [file pone.0101926.s001.pdf]
