# Supplementary material for: A Novel Gene SbSI-2 Encoding Nuclear Protein from a Halophyte Confers Abiotic Stress Tolerance in E. coli and Tobacco
Source: PubMed Central journal article supplement (PMC4084957; doi:10.1371/journal.pone.0101926), 2014-07-07
Supplement: pone.0101926.s002.pdf [file pone.0101926.s002.pdf]

## Figure S2

This view shows ScanProsite results together with ProRule-based predicted intra-domain features.

**Hits by patterns:** [3 hits (by 3 distinct patterns) on 1 sequence]

USERSEQ1

(140 aa) 

**USERPAT1 :**

Pattern (1 - 60): MGFHSFDVFYFFFLSCPNNFCFSLSLSNFQKKSRDKEREIQTN  
YPTFKKSKKNTKPRKK

**USERPAT2 :**

Pattern (61 -120): KARKKMGKYSELIDAGVRIAARFHSHPQTARMYYHPPPPT  
TAESG PTQRYPPDGGVVG

**USERPAT3 :**

Pattern (121 - 140): CKGSSSGVDITKDLILHSIC
