# Supplementary material for: A Novel Gene SbSI-2 Encoding Nuclear Protein from a Halophyte Confers Abiotic Stress Tolerance in E. coli and Tobacco
Source: PubMed Central journal article supplement (PMC4084957; doi:10.1371/journal.pone.0101926), 2014-07-07
Supplement: pone.0101926.s003.pdf [file pone.0101926.s003.pdf]

**Figure S3**

**A**

NUCDISC: discrimination of nuclear localization signals  
 pat4: KPRK (4) at 56  
 pat4: PRKK (4) at 57  
 pat4: RKKK (5) at 58  
 pat7: PTFKKSK (3) at 46  
 pat7: PRKKKAR (5) at 57  
 bipartite: KKS~~SK~~NTKPRKKKARKK at 49  
 bipartite: KKNTKPRKKKARKKMGK at 52  
 content of basic residues: 17.1%  
 NLS Score: 2.18

**B**

CELLO Prediction:

|                |        |
|----------------|--------|
| Nuclear        | 2.075* |
| Mitochondria   | 1.334  |
| Extracellular  | 0.559  |
| Cytoplasmic    | 0.440  |
| Chloroplast    | 0.283  |
| PlasmaMembrane | 0.158  |
| Peroxisomal    | 0.037  |
| Lysosomal      | 0.028  |
| Vacuole        | 0.027  |
| ER             | 0.025  |
| Cytoskeletal   | 0.024  |
| Golgi          | 0.011  |

**C**

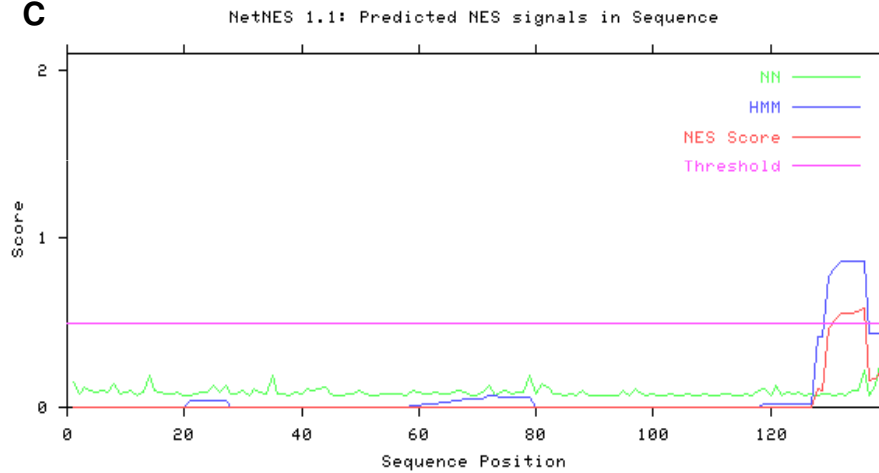

**D**

>Sequence - NetNES 1.1 prediction

| Seq-Pos-Residue | ANN   | HMM   | NES   | Predicted |
|-----------------|-------|-------|-------|-----------|
| Sequence-131-T  | 0.073 | 0.827 | 0.517 | Yes       |
| Sequence-132-K  | 0.080 | 0.862 | 0.553 | Yes       |
| Sequence-133-D  | 0.071 | 0.862 | 0.552 | Yes       |
| Sequence-134-L  | 0.095 | 0.862 | 0.557 | Yes       |
| Sequence-135-I  | 0.102 | 0.862 | 0.561 | Yes       |
| Sequence-136-L  | 0.214 | 0.861 | 0.588 | Yes       |
