# Supplementary material for: A Novel Gene SbSI-2 Encoding Nuclear Protein from a Halophyte Confers Abiotic Stress Tolerance in E. coli and Tobacco
Source: PubMed Central journal article supplement (PMC4084957; doi:10.1371/journal.pone.0101926), 2014-07-07
Supplement: pone.0101926.s004.pdf [file pone.0101926.s004.pdf]

**Figure S4**

**Protein-Protein binding domain**

>query: stretch=5 crowd\_predictions=7 gap=20 itr=0

MGFHSFDVYFFFLSCPNNFCFSLSLSNFQKKS~~RD~~KERE

PP-PP-----P-----P-----

IQTNYPTFKKSKKNTKPRKKKARKKMGKYSELIDAGVRIA

----PP-----P-----

ARFHS~~HC~~PQTARMYYHPPPPTTAESGPTQRYPPQDGGVLG

---P-----P-----PPPPPPPPPPPPPPPPPPPP--PP

CKGSSSGVDITKDLILHSIC

PPP-P-----P
