# Supplementary material for: A Novel Gene SbSI-2 Encoding Nuclear Protein from a Halophyte Confers Abiotic Stress Tolerance in E. coli and Tobacco
Source: PubMed Central journal article supplement (PMC4084957; doi:10.1371/journal.pone.0101926), 2014-07-07
Supplement: pone.0101926.s005.pdf [file pone.0101926.s005.pdf]

**Figure S5**

|                                         |        |       |
|-----------------------------------------|--------|-------|
| Method: NetPhosK without ESS filtering: |        |       |
| Query: Sequence                         |        |       |
| Site                                    | Kinase | Score |
| -----                                   |        |       |
| S-15                                    | PKA    | 0.50  |
| S-28                                    | PKC    | 0.79  |
| T-47                                    | PKC    | 0.91  |
| S-51                                    | PKC    | 0.86  |
| S-51                                    | PKG    | 0.63  |
| T-55                                    | PKC    | 0.92  |
| S-70                                    | PKA    | 0.52  |
| S-85                                    | RSK    | 0.52  |
| S-85                                    | PKA    | 0.72  |
| T-90                                    | PKC    | 0.69  |
| T-108                                   | PKC    | 0.72  |
| S-124                                   | CKI    | 0.53  |
| S-125                                   | PKA    | 0.59  |
| S-125                                   | cdc2   | 0.52  |
| -----                                   |        |       |
| Highest Score: 0.92 PKC at position 55  |        |       |
