# Supplementary material for: A Novel Gene SbSI-2 Encoding Nuclear Protein from a Halophyte Confers Abiotic Stress Tolerance in E. coli and Tobacco
Source: PubMed Central journal article supplement (PMC4084957; doi:10.1371/journal.pone.0101926), 2014-07-07

**Figure S6**

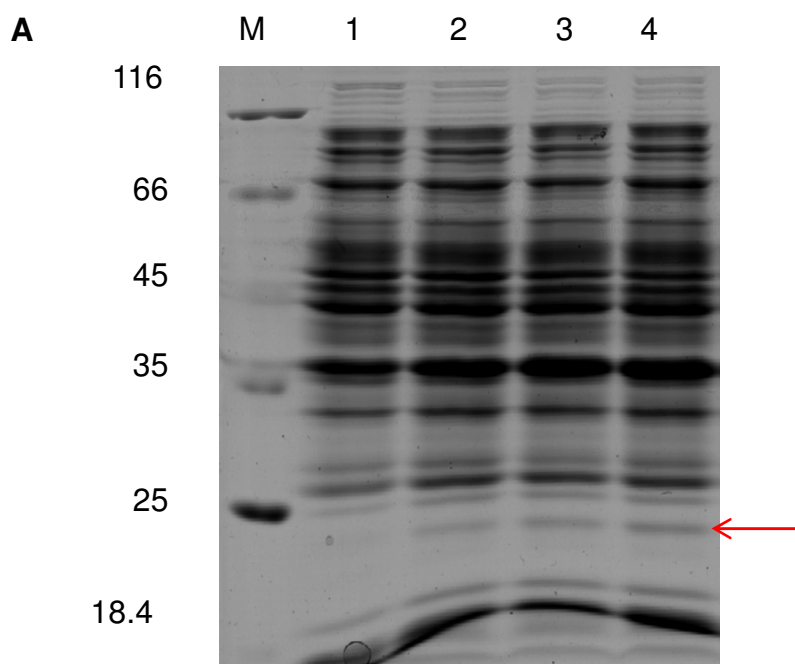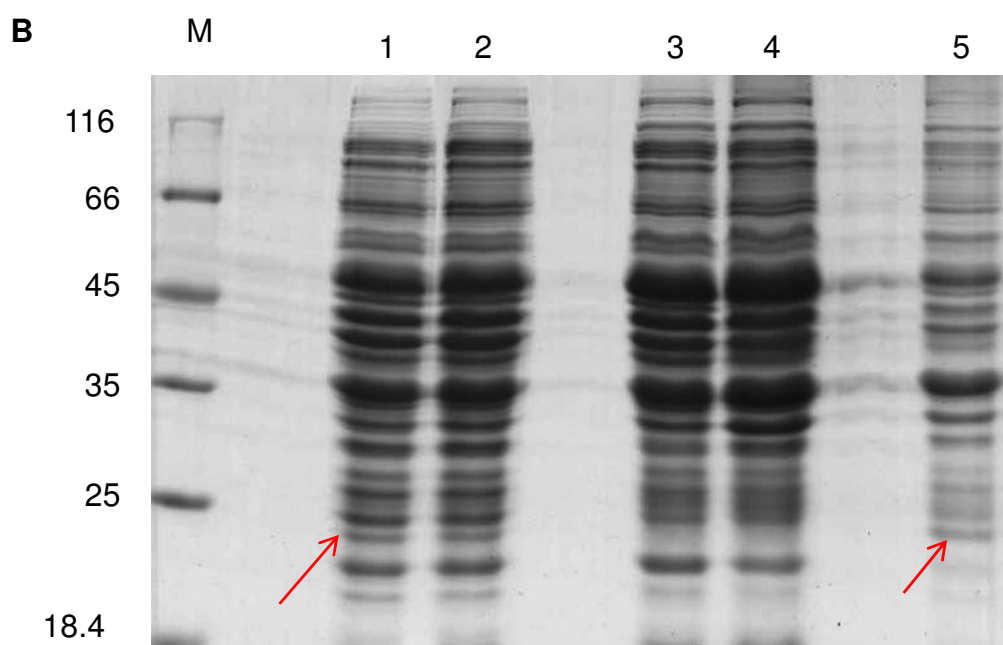

Supplement: pone.0101926.s006.pdf [file pone.0101926.s006.pdf]
